# Supplementary material for: Off-Line SPE LC-LRMS Polyphenolic Fingerprinting and Chemometrics to Classify and Authenticate Spanish Honey
Source: MDPI journal article supplement (doi:10.3390/molecules27227812), 2022-11-13
Supplement: s1 [file s1]

# Off-line SPE LC-LRMS Polyphenolic Fingerprinting and Chemometrics to Classify and Authenticate Spanish Honey

Víctor García-Seval <sup>1</sup>, Javier Saurina <sup>1,2</sup>, Sònia Sentellas <sup>1,2,3</sup> and Oscar Núñez <sup>1,2,3,\*</sup>

<sup>1</sup> Department of Chemical Engineering and Analytical Chemistry, University of Barcelona, Martí i Franquès 1-11, E08028 Barcelona, Spain

<sup>2</sup> Research Institute in Food Nutrition and Food Safety, University of Barcelona, Recinte Torribera, Av. Prat de la Riba 171, Edifici de Recerca (Gaudi), Santa Coloma de Gramenet, E08921 Barcelona, Spain

<sup>3</sup> Serra Hùnter Fellow, Generalitat de Catalunya, Rambla de Catalunya 19-21, E-08007 Barcelona, Spain

\* Correspondence: oscar.nunez@ub.edu

**Table S1.** Multiclass predictions by cross-validation for the set of blossom-honey samples using 3 LVs. BL: Orange/lemon blossom; RO: Rosemary; EU: Eucalyptus; TH: Thyme, and HE: Heather.

| Sample class variety | Sensitivity (%) | Specificity (%) | Classification Error (%) |
|----------------------|-----------------|-----------------|--------------------------|
| BL                   | 100             | 100             | 0                        |
| EU                   | 95.4            | 90.1            | 10.5                     |
| HE                   | 92.2            | 86.4            | 11.6                     |
| RO                   | 91.3            | 85.4            | 10.2                     |
| TH                   | 90.4            | 93.1            | 12.4                     |

**Table S2.** Multiclass predictions by cross-validation for the set of honeydew-honey samples using 3 LVs. HO: Holm oak; MO: Mountain; and FO: Forest.

| Sample class variety | Sensitivity (%) | Specificity (%) | Classification Error (%) |
|----------------------|-----------------|-----------------|--------------------------|
| HO                   | 100             | 100             | 0                        |
| MO                   | 100             | 100             | 0                        |
| FO                   | 100             | 100             | 0                        |

**Table S3.** Number of analyzed honey samples considering botanical varieties and geographical origins

| Honey           | Botanical variety         | Number of samples | Geographical origin           | Number of samples | Climatic geographical origin |
|-----------------|---------------------------|-------------------|-------------------------------|-------------------|------------------------------|
| Blossom-honeys  | Orange/Lemon Blossom (BL) | 12                | Aragon                        | 1                 | LIR                          |
|                 |                           |                   | Balearic Islands              | 2                 | MSR                          |
|                 |                           |                   | Cantabria                     | 1                 | CSR                          |
|                 |                           |                   | Castile and Leon              | 2                 | LIR                          |
|                 |                           |                   | Catalonia                     | 3                 | MSR                          |
|                 |                           |                   | Extremadura                   | 1                 | LIR                          |
|                 |                           |                   | Spain <sup>a</sup>            | 2                 | -                            |
|                 | Eucalyptus (EU)           | 13                | Andalusia                     | 1                 | MSR                          |
|                 |                           |                   | Asturias                      | 2                 | CSR                          |
|                 |                           |                   | Cantabria                     | 1                 | CSR                          |
|                 |                           |                   | Castile and Leon              | 2                 | LIR                          |
|                 |                           |                   | Catalonia                     | 1                 | MSR                          |
|                 |                           |                   | Extremadura                   | 4                 | LIR                          |
|                 |                           |                   | Navarre                       | 1                 | CSR                          |
|                 |                           |                   | Spain and others <sup>a</sup> | 1                 | -                            |
|                 | Rosemary (RO)             | 26                | Andalusia                     | 1                 | MSR                          |
|                 |                           |                   | Aragon                        | 4                 | LIR                          |
|                 |                           |                   | Asturias                      | 1                 | CSR                          |
|                 |                           |                   | Balearic Islands              | 4                 | MSR                          |
|                 |                           |                   | Castile and Leon              | 1                 | LIR                          |
|                 |                           |                   | Cantabria                     | 2                 | CSR                          |
|                 |                           |                   | Catalonia                     | 6                 | MSR                          |
|                 |                           |                   | Extremadura                   | 4                 | LIR                          |
|                 |                           |                   | Navarre                       | 1                 | CSR                          |
|                 |                           |                   | Spain <sup>a</sup>            | 2                 | -                            |
|                 | Thyme (TH)                | 7                 | Castile and Leon              | 1                 | LIR                          |
|                 |                           |                   | Castile La Mancha             | 2                 | LIR                          |
|                 |                           |                   | Catalonia                     | 1                 | MSR                          |
|                 |                           |                   | Extremadura                   | 2                 | LIR                          |
|                 |                           |                   | Spain <sup>a</sup>            | 1                 | -                            |
|                 | Heather (HE)              | 18                | Asturias                      | 2                 | CSR                          |
|                 |                           |                   | Basque Country                | 1                 | CSR                          |
|                 |                           |                   | Cantabria                     | 3                 | CSR                          |
|                 |                           |                   | Castile and Leon              | 5                 | LIR                          |
|                 |                           |                   | Catalonia                     | 2                 | MSR                          |
|                 |                           |                   | Extremadura                   | 5                 | LIR                          |
| Honeydew-honeys | Mountain (MO)             | 6                 | Asturias                      | 2                 | CSR                          |
|                 |                           |                   | Castile and Leon              | 1                 | LIR                          |
|                 |                           |                   | Castile La Mancha             | 1                 | LIR                          |
|                 |                           |                   | Catalonia                     | 2                 | MSR                          |
|                 | Forest (FO)               | 10                | Balearic Islands              | 2                 | MSR                          |
|                 |                           |                   | Cantabria                     | 2                 | CSR                          |
|                 |                           |                   | Castile and Leon              | 1                 | LIR                          |
|                 |                           |                   | Catalonia                     | 1                 | MSR                          |
|                 |                           |                   | Spain <sup>a</sup>            | 4                 | -                            |
|                 | Holm Oak (HO)             | 10                | Aragon                        | 2                 | LIR                          |
|                 |                           |                   | Castile and Leon              | 2                 | LIR                          |
|                 |                           |                   | Extremadura                   | 6                 | LIR                          |
| Other honeys    | Multifloral (MF)          | 34                | Asturias                      | 1                 | CSR                          |
|                 |                           |                   | Balearic Islands              | 4                 | MSR                          |
|                 |                           |                   | Cantabria                     | 1                 | CSR                          |
|                 |                           |                   | Castile and Leon              | 7                 | LIR                          |
|                 |                           |                   | Castile La Mancha             | 2                 | LIR                          |
|                 |                           |                   | Catalonia                     | 8                 | MSR                          |
|                 |                           |                   | Extremadura                   | 4                 | LIR                          |
|                 |                           |                   | Navarre                       | 4                 | CSR                          |
|                 |                           |                   | Spain <sup>a</sup>            | 1                 | -                            |
|                 |                           |                   | Spain and others <sup>a</sup> | 2                 | -                            |

<sup>a</sup> Spain: Honeys produced in Spain but geographical region not specified; Spain and others: Honeys that include mixtures of honey produced in Spain and other countries such as Uruguay, Cuba, Mexico, Romania or Ukraine

**Table S4.** Monitored polyphenolic compounds and MRM acquisition conditions.

| Polyphenolic compound        | Retention time (min) | Precursor ion (m/z) | Product ion (m/z) | Declustering potential (DP, V) | Collision energy (CE, V) | Cell exit potential (CXP, V) |
|------------------------------|----------------------|---------------------|-------------------|--------------------------------|--------------------------|------------------------------|
| Gallic acid                  | 3.1                  | 169                 | 125               | -40                            | -22                      | -19                          |
| Caffeic acid                 | 7.3                  | 179                 | 135               | -45                            | -20                      | -1                           |
| Quercetin                    | 12.6                 | 301                 | 151               | -80                            | -32                      | -1                           |
| Hesperidin                   | 11.8                 | 609                 | 301               | -115                           | -36                      | -19                          |
| Resveratrol                  | 13.0                 | 227                 | 143               | -70                            | -34                      | -1                           |
| Ferulic acid                 | 11.3                 | 193                 | 134               | -30                            | -22                      | -1                           |
| Vanillic acid                | 7.0                  | 167                 | 152               | -65                            | -20                      | -1                           |
| Ethyl gallate                | 9.5                  | 197                 | 124               | -60                            | -34                      | -3                           |
| Catechin                     | 6.3                  | 289                 | 109               | -110                           | -42                      | -19                          |
| Epicatechin                  | 7.5                  | 289                 | 125               | -85                            | -33                      | -7                           |
| <i>p</i> -Coumaric acid      | 6.7                  | 163                 | 119               | -60                            | -18                      | -1                           |
| Rutin                        | 11.3                 | 609                 | 300               | -95                            | -48                      | -23                          |
| Myricetin                    | 12.9                 | 317                 | 151               | -95                            | -40                      | -9                           |
| Syringic acid                | 7.2                  | 197                 | 121               | -40                            | -26                      | -9                           |
| Astilbin                     | 11.6                 | 449                 | 285               | -100                           | -32                      | -1                           |
| <i>trans</i> -Coutaric acid  | 6.7                  | 295                 | 163               | -30                            | -20                      | -11                          |
| Caftaric acid                | 5.4                  | 311                 | 179               | -50                            | -22                      | -11                          |
| Diosmin                      | 11.8                 | 607                 | 299               | -105                           | -34                      | -23                          |
| Hesperetin                   | 11.8                 | 301                 | 286               | -105                           | -36                      | -5                           |
| Naringin                     | 11.8                 | 579                 | 271               | -140                           | -36                      | -5                           |
| Naringenin                   | 14.2                 | 271                 | 151               | -90                            | -32                      | -25                          |
| Catechol                     | 5.8                  | 109                 | 91                | -25                            | -26                      | -5                           |
| 4-Hydroxybenzoic acid        | 6.3                  | 137                 | 93                | -55                            | -18                      | -7                           |
| Ellagic acid                 | 14.2                 | 301                 | 284               | -95                            | -98                      | -1                           |
| Vanillin                     | 9.0                  | 151                 | 136               | -50                            | -14                      | -31                          |
| Epigallocatechin             | 5.6                  | 305                 | 125               | -80                            | -26                      | -25                          |
| Chlorogenic acid             | 6.1                  | 353                 | 191               | -60                            | -20                      | -17                          |
| 3-Methylcatechol             | 11.0                 | 123                 | 108               | -50                            | -22                      | -13                          |
| 4-Ethylcatechol              | 12.7                 | 137                 | 122               | -80                            | -22                      | -5                           |
| 2,5-Dihydroxybenzoic acid    | 6.6                  | 153                 | 108               | -50                            | -18                      | -15                          |
| 4-Methylcatechol             | 11.0                 | 123                 | 108               | -75                            | -22                      | -7                           |
| 3,4-Dihydroxybenzoic acid    | 4.7                  | 153                 | 109               | -70                            | -20                      | -3                           |
| Procyanidin B2               | 7.0                  | 577                 | 407               | -5                             | -26                      | -11                          |
| Procyanidin A2               | 11.7                 | 575                 | 285               | -135                           | -38                      | -1                           |
| Procyanidin C1               | 10.9                 | 865                 | 125               | -180                           | -86                      | -7                           |
| 3-Hydroxytyrosol             | 7.2                  | 153                 | 123               | -50                            | -18                      | -5                           |
| Kaempferol                   | 11.6                 | 285                 | 151               | -85                            | -26                      | -7                           |
| Apigenin                     | 11.7                 | 269                 | 117               | -95                            | -48                      | -7                           |
| Luteolin                     | 13.3                 | 285                 | 133               | -95                            | -50                      | -7                           |
| Oleuropein                   | 11.6                 | 539                 | 59                | -60                            | -78                      | -11                          |
| 4-Vinylguaiacol              | 12.6                 | 149                 | 121               | -125                           | -16                      | -9                           |
| <i>trans</i> -Cinnamic acid  | 12.8                 | 147                 | 103               | -50                            | -16                      | -17                          |
| Guaiacol                     | 9.4                  | 123                 | 95                | -160                           | -20                      | -15                          |
| Pyrogallol                   | 1.4                  | 125                 | 79                | -10                            | -6                       | -1                           |
| Quinic acid                  | 6.1                  | 191                 | 85                | -80                            | -30                      | -5                           |
| Polydatin                    | 13.5                 | 389                 | 227               | -85                            | -20                      | -19                          |
| 3,4-di-O-Caffeoylquinic acid | 10.7                 | 515                 | 353               | -75                            | -28                      | -25                          |
| 4,5-di-O-Caffeoylquinic acid | 11.8                 | 515                 | 173               | -105                           | -36                      | -1                           |
| Pinocembrin                  | 15.7                 | 255                 | 151               | -65                            | -38                      | -1                           |
| Tricetin                     | 12.6                 | 301                 | 149               | -75                            | -52                      | -25                          |
| Galangin                     | 15.8                 | 269                 | 41                | -80                            | -100                     | -3                           |

|             |      |     |     |     |     |     |
|-------------|------|-----|-----|-----|-----|-----|
| Chrysin     | 15.6 | 253 | 63  | -90 | -46 | -3  |
| Pinobanksin | 14.2 | 271 | 253 | -75 | -32 | -11 |
